# Supplementary figures and images for: A scalable, fully automated process for construction of sequence-ready barcoded libraries for 454
Source: Springer Nature journal article supplement (doi:10.1186/gb-2010-11-2-r15), 2010-02-05

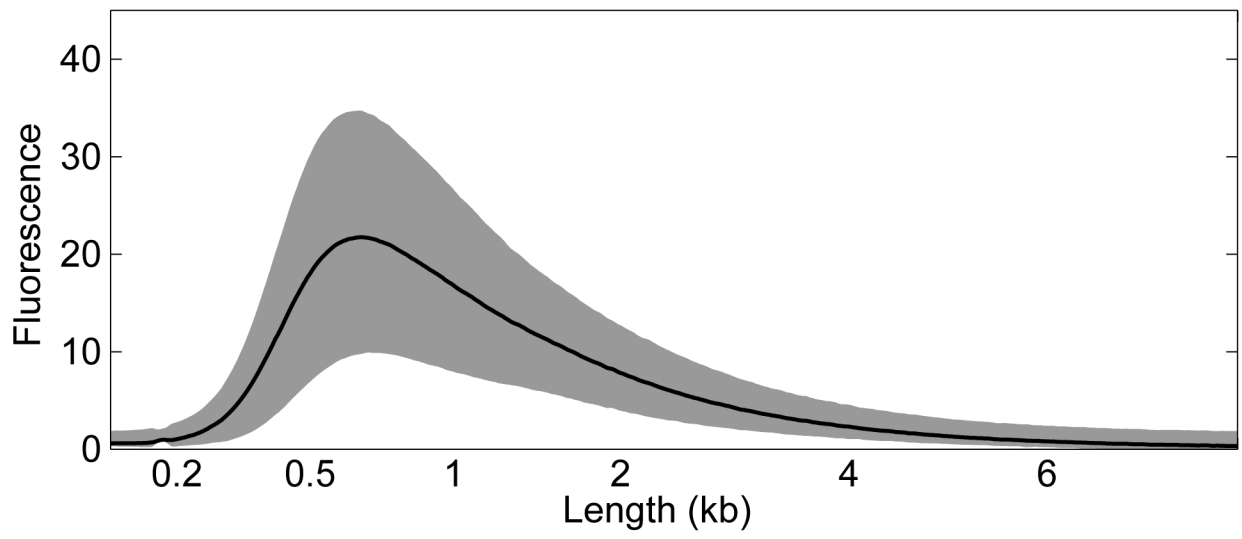

Supplement: Additional file 4 [file gb-2010-11-2-r15-s4.pdf]
